# Supplementary material for: Formalin-induced pain prolongs sub- to supra-second time estimation in rats
Source: PeerJ. 2021 Mar 2;9:e11002. doi: 10.7717/peerj.11002 (PMC7934679; doi:10.7717/peerj.11002)
Supplement: Data S1 [file peerj-09-11002-s001.xlsx]

## Sheet: 0.6-2.4s-logarthmic unit
			Probability of long response								Response latency
Numbered	Session	Grouping	600	756	952	1200	1510	1900	2400		600	756	952	1200	1510	1900	2400	ITI	Omission trials	PSE	SD	Weber fraction	Goodness of fit	Change of PSE relative to baseline	Change of WB relative to baseline
Rat#1	Baseline	Formalin	0.0857143	0.214286	0.0769231	0.642857	0.571429	0.785714	0.941176	Latency	1.20956	1.42357	1.36293	1.09007	0.912071	0.545143	0.310813	20.992	2	1243	522.7	0.420515	0.8748	0	0
Rat#2	Baseline	Saline	0	0	0.1	0.5	0.333333	1	1	Latency	1.02838	1.07486	2.24007	4.53307	3.77429	1.684	0.230853	20.3272	28	1461	425.7	0.291376	0.8923	0	0
Rat#3	Baseline	Saline	0.114286	0.214286	0.285714	0.642857	0.928571	0.928571	0.971429	Latency	1.2969	1.61271	1.61921	2.09271	1.98129	1.25986	0.579029	20.2196	0	1199	217.3	0.181234	0.9808	0	0
Rat#4	Baseline	Saline	0	0	0.142857	0.142857	0.642857	0.857143	1	Latency	1.07035	1.15	1.19786	1.014	0.947214	0.615643	0.287735	20.1687	1	1430	286.8	0.200559	0.9814	0	0
Rat#5	Baseline	Formalin	0.0285714	0.0714286	0.0714286	0.214286	0.785714	0.857143	0.742857	Latency	0.965059	0.801643	0.765071	0.825071	0.301643	0.325357	0.334038	20.4901	0	1287	109.3	0.0849262	0.9911	0	0
Rat#6	Baseline	Formalin	0	0.142857	0.5	0.416667	0.857143	1	0.971429	Latency	1.03894	1.21929	1.50821	1.62429	1.05314	0.200714	0.395706	20.357	3	1141	402.9	0.353111	0.9331	0	0
Rat#7	Baseline	Formalin	0.0857143	0	0	0.153846	0.142857	0.714286	0.971429	Latency	1.41184	1.43936	1.60136	1.87736	1.73329	2.18629	0.590808	19.3497	1	1779	213.4	0.119955	0.9819	0	0
Rat#8	Baseline	Saline	0.0285714	0.0714286	0.571429	0.714286	1	1	0.857143	Latency	1.27697	1.58679	2.43093	1.36043	1.66721	1.10986	0.6094	20.7809	0	956.6	210.9	0.220468	0.9537	0	0
Rat#9	Baseline	Formalin	0.0285714	0.0714286	0	0.285714	0.642857	1	1	Latency	0.937588	0.995071	1.00457	1.10586	1.13586	2.04014	0.449682	19.3321	0	1407	271.8	0.193177	0.9922	0	0
Rat#10	Baseline	Formalin	0.0285714	0.142857	0.142857	0.571429	0.928571	1	1	Latency	1.05185	0.823571	1.11843	1.09329	1.03514	1.91914	0.38371	20.3168	0	1186	194.6	0.164081	0.9937	0	0
Rat#11	Baseline	Saline	0.0294118	0.214286	0.428571	0.714286	0.857143	1	1	Latency	1.09924	1.1495	1.95386	1.12757	1.90564	1.52836	0.196706	19.965	1	1019	317.3	0.311384	0.9894	0	0
Rat#12	Baseline	Formalin	0.0571429	0.142857	0.285714	0.357143	0.928571	1	1	Latency	0.696121	0.902	0.596143	0.930571	0.371	0.2315	0.392618	20.3184	0	1300	184.8	0.142154	0.9776	0	0
Rat#13	Baseline	Saline	0.0285714	0.142857	0	0.357143	0.142857	0.785714	0.971429	Latency	0.962559	1.38043	1.11029	1.26271	1.05557	0.833857	0.507083	20.7196	0	1800	130.2	0.0723333	0.9111	0	0
Rat#14	Baseline	Saline	0.0588235	0	0.0714286	0.428571	0.714286	0.857143	0.971429	Latency	1.3255	1.135	1.30086	0.985714	0.76	0.439286	0.191618	19.7795	1	1266	284.1	0.224408	0.985	0	0
Rat#15	Baseline	Formalin	0	0	0	0.142857	0.285714	0.785714	1	Latency	1.14741	1.12414	1.04829	0.991071	1.14364	0.483786	0.580926	19.7129	1	1669	325.8	0.195207	0.9943	0	0
Rat#16	Baseline	Saline	0	0	0	0	0.142857	0.571429	0.771429	Latency	1.13788	1.20543	0.982714	1.22893	0.696714	1.83057	0.5918	20.1015	2	1739	250.7	0.144163	0.9997	0	0
Rat#1	Injection	Formalin	0.2	0.153846	0.214286	0.642857	0.714286	0.928571	0.935484	Latency	1.30143	1.40638	1.62457	1.64343	1.36843	1.00471	0.605138	20.1499	5	1192	298.2	0.250168	0.9563	-4.10298	-40.5092
Rat#2	Injection	Saline	0	0.0769231	0.111111	0.833333	0.777778	0.923077	1	Latency	0.979941	1.16154	2.642	4.03771	2.312	0.710357	0.0969118	20.5789	21	1074	88.81	0.0826909	0.9761	-26.4887	-71.6205
Rat#3	Injection	Saline	0.142857	0.153846	0.230769	0.428571	0.714286	1	1	Latency	1.1014	1.85543	2.1085	2.40793	1.61629	0.558786	0.658	19.7802	2	1353	333.7	0.246637	0.9981	12.844	36.0874
Rat#4	Injection	Saline	0.114286	0.153846	0.0714286	0.0769231	0.5	0.416667	0.823529	Latency	1.34665	1.44457	1.32271	1.62814	1.12493	1.754	0.324071	20.4963	5	1994	679.1	0.340572	0.8617	39.4406	69.8109
Rat#5	Injection	Formalin	0.114286	0.0714286	0.285714	0.571429	0.857143	0.928571	0.942857	Latency	1.00848	0.951571	0.760429	0.803286	0.399357	0.263071	0.331758	19.8347	0	1146	257.4	0.224607	0.9949	-10.9557	164.474
Rat#6	Injection	Formalin	0.205882	0.214286	0.428571	0.615385	0.785714	1	1	Latency	1.29574	1.27729	1.31707	2.35007	1.573	1.74271	0.652176	19.8377	5	1119	471.7	0.421537	0.9907	-1.92813	19.378
Rat#7	Injection	Formalin	0.0285714	0	0	0	0.307692	0.714286	1	Latency	1.48553	1.61243	1.02957	1.59843	2.13579	1.96721	0.418	19.2355	2	1703	316.1	0.185614	0.9941	-4.27206	54.736
Rat#8	Injection	Saline	0.0857143	0	0.214286	0.571429	0.714286	0.857143	1	Latency	1.37759	1.5875	1.37614	0.852857	0.86	0.5475	0.317	20.3265	0	1182	336.9	0.285025	0.9665	23.5626	29.2818
Rat#9	Injection	Formalin	0.176471	0.0833333	0.571429	0.571429	1	0.846154	1	Latency	1.09489	1.22667	1.29607	2.14757	1.4245	1.45469	0.56004	19.2966	7	1022	308.2	0.301566	0.8983	-27.3632	56.1084
Rat#10	Injection	Formalin	0.0294118	0.214286	0.571429	0.846154	0.928571	1	0.942857	Latency	1.35029	1.561	2.00643	1.44823	1.26786	1.618	0.339	19.2099	2	911.1	204.1	0.224015	0.9942	-23.1788	36.5271
Rat#11	Injection	Saline	0	0.0714286	0.461538	0.357143	1	1	0.971429	Latency	1.2995	1.24736	1.26071	2.11714	1.30829	1.2495	0.521667	19.8651	2	1158	325.1	0.280743	0.9134	13.6408	-9.84029
Rat#12	Injection	Formalin	0	0	0.357143	0.615385	0.642857	0.583333	0.96875	Latency	0.734765	0.666	0.9315	1.79379	1.59021	1.83429	0.393452	19.89	7	977.6	159.8	0.163462	0.8772	-24.8	14.9892
Rat#13	Injection	Saline	0.257143	0.307692	0.357143	0.5	0.642857	0.923077	1	Latency	1.13773	1.91579	1.49671	1.61821	1.76986	1.43708	0.568536	21.2363	2	1443	475.2	0.329314	0.9948	-19.8333	355.273
Rat#14	Injection	Saline	0	0	0	0.0714286	0.142857	0.714286	0.971429	Latency	1.42959	1.51108	1.06893	1.10086	0.771857	0.645714	0.489235	19.6671	2	1760	234.3	0.133125	0.9968	39.0205	-40.6771
Rat#15	Injection	Formalin	0	0	0.0714286	0.615385	0.928571	1	1	Latency	0.884	0.991286	1.40514	1.84908	1.14743	1.4265	0.6289	19.5236	2	1155	144.2	0.124848	0.9979	-30.7969	-36.0429
Rat#16	Injection	Saline	0.142857	0	0.0714286	0	0.357143	0.5	0.914286	Latency	1.55683	1.57264	1.34086	1.373	1.03743	1.28829	0.444238	19.8471	0	1903	469.4	0.246663	0.9428	9.43071	71.0998
Rat#1	Post-day1	Formalin	0.0285714	0.0714286	0.714286	0.642857	0.785714	0.928571	0.914286	Latency	1.44112	1.49207	1.69814	1.25379	1.46907	1.10764	0.531906	21.2123	0	871.4	71.94	0.0825568	0.9381	-29.8954	-80.3677
Rat#2	Post-day1	Saline	0	0	0	0	0.555556	0.666667	0.971429	Latency	1.00059	1.73836	1.80171	4.025	2.91714	1.39021	0.213971	20.7858	23	1556	329.4	0.211697	0.9446	6.5024	-27.3458
Rat#3	Post-day1	Saline	0.0857143	0.357143	0.142857	0.5	0.769231	0.923077	1	Latency	1.05516	1.55464	1.97093	2.03064	2.06229	1.84693	0.557353	20.014	2	1305	301.7	0.231188	0.9355	8.8407	27.5629
Rat#4	Post-day1	Saline	0	0.0714286	0.0714286	0.5	0.785714	0.928571	1	Latency	0.989118	0.981929	0.962857	1.39264	1.026	0.836071	0.292059	20.1322	1	1226	264.6	0.215824	0.9879	-14.2657	7.6109
Rat#5	Post-day1	Formalin	0.0571429	0	0.357143	0.571429	0.5	0.692308	0.914286	Latency	0.906333	0.898571	0.926	0.608286	0.435071	0.854143	0.516844	19.9774	1	1287	596.6	0.463559	0.8712	0	445.837
Rat#6	Post-day1	Formalin	0	0.142857	0.142857	0.5	0.785714	1	0.942857	Latency	1.09741	1.11179	1.01429	1.16921	1.4095	1.10864	0.598818	20.9181	1	1218	306.2	0.251396	0.9879	6.74847	-28.8055
Rat#7	Post-day1	Formalin	0	0	0	0	0.0769231	0.769231	0.911765	Latency	1.16429	1.4065	1.98114	1.92679	1.85269	2.0675	0.81984	19.2209	4	1735	163.5	0.0942363	1	-2.4733	-21.4403
Rat#8	Post-day1	Saline	0.0333333	0.0833333	0.0909091	0.416667	0.8	0.928571	0.9	Latency	1.52555	2.12867	1.91345	1.39192	1.9717	1.34643	0.714818	19.1914	21	1248	216.9	0.173798	0.9973	30.4621	-21.1687
Rat#9	Post-day1	Formalin	0.0571429	0.142857	0.285714	0.714286	0.857143	0.928571	1	Latency	1.11783	1.80464	1.54743	1.7705	1.45129	1.49579	0.562929	19.256	1	1073	230.4	0.214725	0.99	-23.7385	11.1546
Rat#10	Post-day1	Formalin	0.290323	0.615385	0.727273	0.916667	0.818182	0.928571	0.966667	Latency	1.34561	1.99215	1.89736	1.57533	1.73055	1.7745	0.63256	19.0434	18	687.8	240.7	0.349956	0.94	-42.0067	113.283
Rat#11	Post-day1	Saline	0.114286	0.285714	0.230769	0.428571	0.642857	0.692308	0.828571	Latency	1.24693	1.4515	1.60623	1.40136	1.65793	1.12936	0.473038	18.2871	2	1169	604.8	0.517365	0.9609	14.7203	66.1504
Rat#12	Post-day1	Formalin	0	0	0.214286	0.571429	0.583333	1	1	Latency	0.919676	0.840571	1.71821	2.53893	2.77471	0.965571	0.182853	20.3759	4	1274	399.2	0.313344	0.9492	-2	120.426
Rat#13	Post-day1	Saline	0	0	0.428571	0.428571	0.642857	0.928571	0.971429	Latency	1.18432	1.67314	1.9235	1.96436	1.30357	1.94429	0.495538	20.2343	1	1251	445.5	0.356115	0.936	-30.5	392.325
Rat#14	Post-day1	Saline	0.0285714	0	0.0714286	0	0.5	0.857143	1	Latency	1.33209	1.20757	1.15936	1.09464	0.685429	0.406214	0.336	20.0702	0	1508	30.46	0.0201989	0.9879	19.1153	-90.999
Rat#15	Post-day1	Formalin	0.0857143	0	0.0714286	0.214286	0.928571	0.785714	0.971429	Latency	1.08841	1.03707	0.888714	0.663357	0.382	0.495214	0.451059	19.7568	0	1319	13.23	0.0100303	0.9627	-20.9706	-94.8617
Rat#16	Post-day1	Saline	0.142857	0.214286	0	0.0714286	0.642857	0.714286	1	Latency	1.13353	1.28221	1.26338	1.25764	0.932714	0.6735	0.251294	19.9005	1	1500	18.29	0.0121933	0.9252	-13.7435	-91.542
Rat#1	Post-day2	Formalin	0.0857143	0.428571	0.5	0.714286	0.769231	0.857143	0.885714	Latency	1.35191	1.90221	1.46621	1.65486	1.78071	1.43279	0.0696129	20.8184	1	854.9	325.7	0.38098	0.9461	-31.2228	-9.40149
Rat#2	Post-day2	Saline	0.0285714	0	0	0	0.333333	0.2	0.942857	Latency	1.32726	1.68379	1.84529	3.25293	4.50207	3.90843	0.356848	20.228	28	2142	235.5	0.109944	0.8823	46.6119	-62.2673
Rat#3	Post-day2	Saline	0.0588235	0	0.0714286	0.5	0.384615	0.769231	0.971429	Latency	1.12544	1.58479	1.684	2.59671	2.791	1.30992	0.601647	18.8909	3	1510	547.2	0.362384	0.9138	25.9383	99.9533
Rat#4	Post-day2	Saline	0	0	0.214286	0.769231	0.857143	0.785714	0.942857	Latency	1.26941	1.24607	1.17664	1.45236	1.21093	0.947	0.343121	19.4623	2	1040	127.9	0.122981	0.9882	-27.2727	-38.6811
Rat#5	Post-day2	Formalin	0	0	0.142857	0.571429	0.785714	1	0.885714	Latency	0.874059	0.944929	0.883571	0.508857	0.325857	0.544143	0.358355	20.3899	2	1158	224.7	0.194041	0.9841	-10.0233	128.482
Rat#6	Post-day2	Formalin	0	0	0.285714	0.857143	0.75	0.923077	1	Latency	1.24235	1.09886	1.3115	1.66629	1.9485	1.58407	0.748706	19.0651	5	1003	107.9	0.107577	0.9714	-12.0947	-69.5345
Rat#7	Post-day2	Formalin	0	0	0.0714286	0.0714286	0.307692	0.384615	0.970588	Latency	1.41664	1.78792	1.92429	1.85164	2.2315	1.70064	0.628893	18.0381	5	1950	436	0.22359	0.9518	9.61214	86.3946
Rat#8	Post-day2	Saline	0.0882353	0.0714286	0.0714286	0.428571	0.846154	1	0.942857	Latency	1.25755	1.482	1.66464	1.40807	1.51308	1.40929	0.62	19.5924	2	1261	198.5	0.157415	0.995	31.821	-28.5998
Rat#9	Post-day2	Formalin	0	0.214286	0.5	0.642857	0.857143	1	1	Latency	96.1494	1.87936	1.83743	3.314	1.39593	2.60179	0.800148	20.3956	1	1028	343.9	0.334533	0.9732	-26.9367	73.1744
Rat#10	Post-day2	Formalin	0.212121	0.5	0.571429	0.857143	1	0.916667	0.969697	Latency	1.30843	2.31821	1.64907	1.91514	1.36586	1.2205	0.413769	19.9553	6	813.5	334.1	0.410695	0.9655	-31.4081	150.3
Rat#11	Post-day2	Saline	0.0882353	0.214286	0.428571	0.5	0.428571	0.785714	0.941176	Latency	1.13496	2.31907	1.93386	2.18586	1.69121	1.15371	0.26931	18.2382	2	1377	799.3	0.580465	0.9024	35.1325	86.4146
Rat#12	Post-day2	Formalin	0.0285714	0	0.357143	0.642857	0.642857	0.714286	0.971429	Latency	0.852382	0.577357	1.48964	1.71929	1.57829	1.24729	0.290794	20.2722	0	996.7	180.4	0.180997	0.9154	-23.3308	27.3249
Rat#13	Post-day2	Saline	0	0.0714286	0.214286	0.785714	0.642857	0.857143	0.942857	Latency	1.28821	2.22936	1.43607	1.5065	2.33	0.581357	0.525552	21.6579	1	1025	101.3	0.0988293	0.9468	-43.0556	36.6303
Rat#14	Post-day2	Saline	0	0	0	0	0.5	0.928571	1	Latency	1.4415	1.55064	1.37721	1.19057	0.902286	0.495643	0.498529	19.994	1	1505	116.9	0.0776744	0.998	18.8784	-65.3869
Rat#15	Post-day2	Formalin	0.0285714	0.0714286	0	0.357143	0.714286	0.857143	1	Latency	0.977294	1.10536	0.866857	0.567857	0.586571	0.452643	0.419971	20.2819	0	1319	258.5	0.195982	0.981	-20.9706	0.397063
Rat#16	Post-day2	Saline	0.0857143	0	0.214286	0.461538	0.428571	0.928571	1	Latency	1.24956	1.48121	1.1795	1.47386	0.912	0.836357	0.266548	20.1955	1	1447	488.8	0.337802	0.9378	-16.7913	134.319
Rat#1	Post-day3	Formalin	0	0.142857	0.357143	0.571429	0.928571	0.928571	0.914286	Latency	1.37474	1.45514	1.69829	1.64386	1.75443	1.34107	0.225906	20.8434	1	1073	290.6	0.270829	0.9885	-13.6766	-35.5958
Rat#2	Post-day3	Saline	0	0	0.1	0.375	0.333333	1	1	Latency	1.37797	1.51021	2.46157	3.37393	4.51786	3.55771	0.401559	20.4709	31	1534	367.8	0.239765	0.9326	4.99658	-17.7127
Rat#3	Post-day3	Saline	0.0285714	0	0.153846	0.0833333	0.416667	0.666667	1	Latency	1.02518	1.20586	2.155	2.308	3.09721	2.23929	0.423882	20.4261	7	1700	443	0.260588	0.9779	41.7848	43.7852
Rat#4	Post-day3	Saline	0.0294118	0.142857	0.142857	0.357143	0.928571	0.857143	1	Latency	1.20385	1.08336	0.990643	1.30286	1.11314	0.759857	0.375971	19.8234	1	1259	117.9	0.0936458	0.9824	-11.958	-53.3077
Rat#5	Post-day3	Formalin	0	0.0714286	0.428571	0.857143	0.857143	0.785714	0.914286	Latency	0.891353	0.872286	0.896	0.728786	0.244357	0.267357	0.754562	19.488	1	951.1	125.9	0.132373	0.9902	-26.0995	55.8683
Rat#6	Post-day3	Formalin	0	0.0714286	0.285714	0.785714	0.923077	0.846154	0.942857	Latency	1.38806	1.47829	1.44157	1.36136	1.24586	1.17164	0.496212	20.0337	3	1028	158.7	0.154377	0.9942	-9.90359	-56.2808
Rat#7	Post-day3	Formalin	0	0.0714286	0	0	0.0714286	0.692308	0.971429	Latency	1.42259	2.03414	2.20757	2.05536	1.87886	2.09014	0.54804	19.1336	2	1801	182.4	0.101277	0.996	1.23665	-15.5708
Rat#8	Post-day3	Saline	0.142857	0.142857	0.285714	0.357143	0.785714	1	0.942857	Latency	1.30921	2.07193	1.99014	1.22364	2.01171	1.96643	0.745654	21.4117	0	1341	248.5	0.185309	0.9874	40.184	-15.9473
Rat#9	Post-day3	Formalin	0.0285714	0.0714286	0	0.571429	0.642857	0.928571	1	Latency	1.39396	1.90357	1.75543	1.73514	1.09071	1.94643	0.777156	20.5641	0	1276	335.6	0.263009	0.9404	-9.31059	36.1495
Rat#10	Post-day3	Formalin	0.117647	0.384615	0.428571	0.785714	0.928571	0.857143	1	Latency	1.588	2.08892	1.5525	1.95271	1.25307	1.41757	0.428138	20.2628	3	918.4	331.3	0.360736	0.9577	-22.5632	119.853
Rat#11	Post-day3	Saline	0.0285714	0.357143	0.428571	0.428571	0.642857	0.857143	1	Latency	1.1855	2.04186	2.19543	1.72821	1.49993	1.53236	0.213871	18.3971	0	1245	662.3	0.531968	0.926	22.1786	70.84
Rat#12	Post-day3	Formalin	0	0.0714286	0.285714	0.461538	0.769231	1	0.971429	Latency	0.782147	0.841143	1.43229	2.24057	2.10993	1.1455	0.378676	20.4182	3	1218	359.7	0.29532	0.9921	-6.30769	107.747
Rat#13	Post-day3	Saline	0	0	0.0714286	0.142857	0.142857	0.714286	1	Latency	21.2477	1.74071	2.00586	1.88521	2.12771	2.237	0.796926	21.2683	1	1786	224.7	0.125812	0.9858	-0.777778	73.9335
Rat#14	Post-day3	Saline	0	0	0.0714286	0.142857	0.5	1	0.971429	Latency	1.30706	1.36093	1.09907	0.907643	0.868	0.845214	0.389441	19.9153	1	1505	237.5	0.157807	0.9945	18.8784	-29.6783
Rat#15	Post-day3	Formalin	0.0285714	0.0714286	0.0714286	0.214286	0.5	0.928571	0.971429	Latency	1.17671	1.11221	0.970357	0.962214	0.78	0.784929	0.379324	20.4295	0	1506	295.5	0.196215	0.9972	-9.76633	0.516595
Rat#16	Post-day3	Saline	0.0285714	0.0714286	0.214286	0.571429	0.714286	0.769231	0.942857	Latency	1.26791	1.269	1.19486	1.46143	1.04079	1.17846	0.321115	19.9463	1	1117	285.5	0.255595	0.9726	-35.7677	77.2957

## Sheet: 2-8s-logarthmic unit
			Probability of long response								Response latency
Numbered	Timepoint	Grouping	2000	2520	3170	4000	5040	6350	8000		2000	2520	3170	4000	5040	6350	8000	ITI	Omission trials	PSE	SD	R square	Weber fraction	Change of PSE relative to baseline	Change of WB relative to baseline
Rat#1	Baseline	Saline	0.0285714	0.0769231	0.571429	0.923077	0.923077	0.928571	1	Latency	0.572036	1.291	1.41707	1.51107	1.94836	0.497643	0.100036	18.3483	3	3.085	0.3637	0.9962	0.117893	0	0
Rat#2	Baseline	Saline	0	0	0.142857	0.428571	0.428571	0.5	0.942857	Latency	0.388618	0.595	0.727786	0.553929	0.601429	0.587786	0.262152	16.9623	4	5.525	2.316	0.8953	0.419186	0	0
Rat#3	Baseline	Saline	0	0.111111	0.5	0.666667	0.714286	1	0.928571	Latency	0.470935	2.49721	1.92707	2.30279	2.56007	0.918786	0.002	17.3677	34	3.37	1.002	0.9361	0.297329	0	0
Rat#4	Baseline	Saline	0	0.0769231	0.583333	0.8	0.8	1	1	Latency	0.614706	0.567	1.72736	0.5531	0.645	0.719545	0.260788	13.6912	18	3.035	0.4058	0.9623	0.133707	0	0
Rat#5	Baseline	Saline	0.0294118	0.0769231	0.454545	0.363636	0.75	0.666667	0.967742	Latency	0.634364	1.07579	1.63221	1.8105	1.01238	1.53207	0.584267	14.2462	16	4.02	1.727	0.8725	0.429602	0	0
Rat#6	Baseline	Saline	0	0	0.357143	0.428571	0.857143	1	1	Latency	0.300618	0.461	0.464071	0.348	0.337714	0.257643	0.198882	17.1488	1	3.981	1.085	0.9715	0.272545	0	0
Rat#7	Baseline	Formalin	0	0	0.461538	0.285714	0.785714	0.692308	0.828571	Latency	1.14682	1.138	1.23943	0.9095	0.455786	0.975214	0.264172	18.7454	2	3.754	1.15	0.8476	0.30634	0	0
Rat#8	Baseline	Formalin	0	0	0.481481	0.428571	0.785714	0.928571	1	Latency	0.122687	0.738571	1.66686	1.64029	1.3655	0.700571	0.347706	19.4051	2	3.971	1.338	0.9268	0.336943	0	0
Rat#9	Baseline	Formalin	0	0.307692	0.0714286	0.5	0.714286	0.928571	0.971429	Latency	0.769971	2.21729	2.42871	2.17764	1.76193	0.559286	0.411794	18.7958	2	4.261	1.202	0.9259	0.282093	0	0
Rat#10	Baseline	Formalin	0	0.0714286	0.518519	0.833333	1	1	1	Latency	0.289324	0.635615	1.41493	1.14093	0.338214	0.502929	0.307882	18.7724	4	3.218	0.6063	0.9915	0.188409	0	0
Rat#11	Baseline	Formalin	0	0	0.5	0.769231	0.928571	1	0.914286	Latency	0.407531	0.591429	0.945714	1.26043	0.921286	0.532143	0.152687	17.8741	2	3.224	0.5428	0.9763	0.168362	0	0
Rat#12	Baseline	Formalin	0	0	0.545455	0.444444	0.454545	0.769231	0.971429	Latency	0.396091	0.322	2.36693	3.2415	2.60164	0.881769	0.378618	16.5584	14	4.618	2.236	0.8147	0.484192	0	0
Rat#13	Baseline	Saline	0	0	0.0769231	0.461538	0.846154	0.923077	1	Latency	0.357647	0.340846	0.543385	0.641308	0.525	0.380692	0.431676	16.3142	7	4.071	0.716	0.9961	0.175878	0	0
Rat#14	Baseline	Formalin	0	0	0.0769231	0.333333	0.428571	0.642857	0.941176	Latency	0.493292	0.675231	1.02115	0.966667	1.25764	0.771143	0.555217	17.4809	6	5.397	1.888	0.9723	0.349824	0	0
Rat#15	Baseline	Saline	0	0	0	0.785714	0.857143	1	1	Latency	0.609588	1.2405	0.590357	0.578357	0.957929	0.365643	0.196931	18.6902	4	3.883	0.1247	0.9907	0.0321143	0	0
Rat#1	Injection	Saline	0	0.0714286	0.5	0.857143	0.928571	0.857143	0.914286	Latency	0.631871	1.73636	1.34636	1.53721	1.21393	0.724286	0.293241	18.233	1	3.112	0.4361	0.9966	0.140135	0.875203	18.8662
Rat#2	Injection	Saline	0	0	0.333333	0.692308	0.923077	0.818182	0.969697	Latency	0.290312	0.707154	0.529667	0.629692	0.370769	0.676182	0.283406	15.5923	13	3.182	0.04616	0.9396	0.0145066	-42.4072	-96.5393
Rat#3	Injection	Saline	0	0.285714	0.363636	0.4	0.571429	0.636364	0.9375	Latency	0.505346	1.31821	1.72343	1.22464	1.10629	0.796286	0.0577097	17.15	31	4.71	2.716	0.9079	0.576645	39.7626	93.9416
Rat#4	Injection	Saline	0.030303	0	0.0769231	0.333333	0.75	0.727273	0.941176	Latency	0.668875	1.35267	1.28107	1.24423	1.3325	1.37738	0.303125	14.1487	14	4.191	0.6922	0.9747	0.165163	38.089	23.5266
Rat#5	Injection	Saline	0	0	0.384615	0.416667	0.714286	0.833333	0.914286	Latency	0.914545	1.53854	1.53929	1.108	0.941	1.22614	0.599156	15.4567	8	3.934	1.244	0.9516	0.316218	-2.1393	-26.3929
Rat#6	Injection	Saline	0	0.0769231	0.142857	0.692308	0.769231	0.714286	0.970588	Latency	0.273235	0.685308	0.753786	0.356917	0.620615	0.500714	0.204303	16.0918	5	3.604	0.4039	0.9579	0.11207	-9.46998	-58.8802
Rat#7	Injection	Formalin	0.264706	0.461538	0.384615	0.538462	0.857143	0.928571	0.969697	Latency	0.46144	1.27985	0.771846	1.03723	0.381286	0.642357	0.279875	15.4813	6	4.22	1.099	0.955	0.260427	12.4134	-14.9877
Rat#8	Injection	Formalin	0	0	0.285714	0.416667	0.846154	0.785714	1	Latency	0.297324	0.230214	0.872429	2.14908	1.58307	1.18379	0.394324	18.4486	4	3.934	0.9678	0.9584	0.246009	-0.931755	-26.9879
Rat#9	Injection	Formalin	0	0	0.461538	0.75	0.916667	0.75	0.971429	Latency	0.627324	0.658462	1.51743	2.99931	2.47069	1.70221	0.374735	16.6874	13	3.16	0.4147	0.9608	0.131234	-25.839	-53.4785
Rat#10	Injection	Formalin	0	0	0.75	0.846154	1	0.785714	0.971429	Latency	0.280559	0.311	2.14043	1.23192	0.7355	0.558143	0.313647	16.8894	4	3.065	0.109	0.9726	0.0355628	-4.75451	-81.1247
Rat#11	Injection	Formalin	0	0.0769231	0.384615	0.769231	0.923077	1	0.914286	Latency	0.271281	0.765385	0.922	0.981846	0.660692	0.489571	0.0245	17.4933	6	3.368	0.6691	0.9947	0.198664	4.4665	17.9979
Rat#12	Injection	Formalin	0	0.0833333	0.444444	0.333333	0.875	0.846154	1	Latency	0.362706	1.11979	3.05343	3.00314	3.16871	0.964143	0.470265	15.7088	20	3.943	1.307	0.9115	0.331473	-14.6167	-31.5409
Rat#13	Injection	Saline	0	0	0.0769231	0.785714	0.785714	0.846154	1	Latency	0.428455	0.70025	0.611538	0.602643	0.686143	0.465154	0.545323	16.2839	10	3.601	0.3178	0.9799	0.0882533	-11.5451	-49.8214
Rat#14	Injection	Formalin	0.0285714	0	0.142857	0.5	0.857143	0.928571	1	Latency	0.440385	1.3605	1.42643	1.31136	1.39936	0.902643	0.59087	17.0808	0	3.986	0.7918	0.9962	0.198645	-26.1442	-43.2157
Rat#15	Injection	Saline	0	0	0.230769	0.285714	0.571429	0.857143	0.914286	Latency	0.608793	1.36386	1.08208	1.21571	0.767714	0.597071	0.32376	17.7729	2	4.584	1.382	0.9837	0.301483	18.0531	838.781
Rat#1	Post-day1	Saline	0	0	0.5	0.642857	1	1	0.971429	Latency	0.611483	1.03557	1.80357	1.22671	1.534	0.224571	0.277519	18.233	1	3.482	0.8337	0.9596	0.239431	12.8687	103.092
Rat#2	Post-day1	Saline	0	0	0.357143	0.714286	0.928571	0.785714	0.942857	Latency	0.321118	0.318357	0.532429	0.605857	0.439714	0.478714	0.248273	15.4	1	3.387	0.5946	0.978	0.175554	-38.6968	-58.1203
Rat#3	Post-day1	Saline	0	0.272727	0.75	0.857143	0.875	0.909091	0.939394	Latency	0.505346	1.67379	2.517	2.63736	2.24914	1.26421	0.0577097	17.4702	36	2.748	0.4145	0.9937	0.150837	-18.457	-49.2694
Rat#4	Post-day1	Saline	0	0	0.214286	0.416667	0.5	1	0.911765	Latency	0.517147	0.684667	1.03079	1.61393	1.24979	0.27575	0.316355	14.2098	8	4.529	1.383	0.9509	0.305365	49.2257	128.384
Rat#5	Post-day1	Saline	0	0	0.692308	0.571429	0.714286	0.714286	0.942857	Latency	0.940029	1.16143	1.3845	1.0385	1.01871	0.753643	0.599909	15.8542	2	2.951	0.1403	0.9144	0.0475432	-26.592	-88.9332
Rat#6	Post-day1	Saline	0	0.0714286	0.5	0.769231	0.769231	1	1	Latency	0.303382	0.3965	0.454429	0.548643	0.543357	0.342071	0.197235	16.78	3	3.195	0.6153	0.9557	0.192582	-19.7438	-29.3392
Rat#7	Post-day1	Formalin	0.0857143	0.214286	0.142857	0.5	0.785714	0.928571	1	Latency	0.780156	0.963	1.06357	0.686857	0.490429	0.238714	0.258118	18.4399	0	4.223	0.9512	0.9812	0.225243	12.4933	-26.4729
Rat#8	Post-day1	Formalin	0.0285714	0.0714286	0.727273	0.545455	0.769231	1	1	Latency	0.163258	0.391429	2.37986	2.02962	1.94121	0.866	0.265176	18.4129	7	3.476	1.35	0.8336	0.388377	-12.4654	15.2651
Rat#9	Post-day1	Formalin	0.0285714	0.181818	0.8	0.666667	0.8	0.875	0.911765	Latency	0.796412	1.64567	3.46929	3.60454	3.54071	2.19092	0.563806	16.8287	36	2.707	0.2184	0.9536	0.0806797	-36.4703	-71.3996
Rat#10	Post-day1	Formalin	0	0.153846	0.666667	0.857143	1	0.769231	0.971429	Latency	0.304735	0.9055	1.75336	1.48614	0.437929	0.614615	0.308206	17.8357	5	2.91	0.4089	0.9643	0.140515	-9.57116	-25.42
Rat#11	Post-day1	Formalin	0	0	0.357143	0.538462	0.846154	0.5	0.857143	Latency	0.5598	0.658357	0.752786	0.989615	0.756143	0.9635	0.18436	17.9346	3	3.354	0.6685	0.8665	0.199314	4.03226	18.3841
Rat#12	Post-day1	Formalin	0	0	0.833333	0.666667	1	1	0.969697	Latency	0.356906	3.05164	3.48793	3.21879	3.723	0.747286	0.439562	16.0649	39	3.012	0.1145	0.9356	0.0380146	-34.777	-92.1489
Rat#13	Post-day1	Saline	0	0	0.153846	0.428571	0.785714	0.857143	1	Latency	0.492588	0.491714	0.942	1.14679	0.3875	0.527429	0.592235	15.8474	2	4.113	0.9218	0.9897	0.224119	1.03169	27.4284
Rat#14	Post-day1	Formalin	0	0	0.153846	0.428571	0.785714	0.928571	0.971429	Latency	0.660464	1.32179	1.07308	1.07393	1.59629	1.96679	0.566739	17.541	2	4.138	0.9303	0.9977	0.224819	-23.3278	-35.7337
Rat#15	Post-day1	Saline	0	0.142857	0.571429	0.714286	0.928571	0.857143	0.857143	Latency	0.7932	1.14686	1.17021	1.12207	0.821857	0.796857	0.140185	18.5323	1	3.01	0.5724	0.9748	0.190166	-22.4826	492.153
Rat#1	Post-day2	Saline	0	0.142857	0.384615	0.714286	0.928571	1	1	Latency	0.521815	2.17957	1.98436	0.969143	1.15093	1.05057	0.124724	19.5998	2	3.467	0.8812	0.9967	0.254168	12.3825	115.592
Rat#2	Post-day2	Saline	0	0.142857	0.181818	0.714286	0.785714	0.785714	0.971429	Latency	0.298206	0.408	1.15862	0.386571	0.416214	0.522857	0.245559	15.9667	4	3.598	0.434	0.9641	0.120623	-34.8778	-71.2245
Rat#3	Post-day2	Saline	0	0.181818	0.833333	0.25	0.833333	0.8	0.903226	Latency	0.511786	1.61214	3.21957	2.64471	2.92357	1.7155	0.0171786	17.2211	40	3.345	1.553	0.6085	0.464275	-0.74184	56.1484	Excluded for low R square
Rat#4	Post-day2	Saline	0	0	0.142857	0.769231	0.785714	1	1	Latency	0.366882	0.470071	0.716714	0.914231	1.00457	0.295786	0.283412	14.6573	3	3.229	0.05924	0.9611	0.0183462	6.39209	-86.2788
Rat#5	Post-day2	Saline	0.030303	0.0714286	0.181818	0.416667	0.846154	0.692308	0.942857	Latency	0.6125	1.00321	2.0755	1.7485	1.37236	0.9135	0.558848	16.0152	9	3.989	0.6671	0.9546	0.167235	-0.771144	-61.0721
Rat#6	Post-day2	Saline	0	0.0714286	0.692308	0.714286	1	1	0.971429	Latency	0.213235	0.450571	1.03321	0.3235	0.228286	0.305929	0.194324	15.1379	2	3.015	0.317	0.9261	0.105141	-24.2653	-61.4225
Rat#7	Post-day2	Formalin	0	0	0.142857	0.285714	0.857143	0.714286	0.942857	Latency	0.902235	1.08714	0.705643	1.00329	0.424429	0.472571	0.235939	18.4006	1	4.186	0.3692	0.9597	0.0881988	11.5077	-71.2089
Rat#8	Post-day2	Formalin	0	0.0769231	0.545455	0.4	0.8	1	0.971429	Latency	0.405147	0.846071	1.976	2.50979	2.56243	1.08843	0.299647	19.3247	15	3.871	1.392	0.9057	0.359597	-2.51826	6.72345
Rat#9	Post-day2	Formalin	0	0.142857	0.769231	0.846154	0.785714	1	1	Latency	0.748824	0.926929	1.77043	1.972	0.955143	0.279071	0.367294	18.5496	3	2.842	0.3203	0.9641	0.112702	-33.302	-60.0479
Rat#10	Post-day2	Formalin	0	0.0714286	0.692308	0.583333	0.857143	1	1	Latency	0.303235	0.510214	1.40457	1.40514	0.642571	0.379857	0.336059	18.2414	4	3.323	1.029	0.8799	0.30966	3.2629	64.3552
Rat#11	Post-day2	Formalin	0	0	0.214286	0.769231	0.857143	0.857143	0.857143	Latency	0.405088	0.253385	0.8585	1.02386	0.353714	0.713143	0.223655	17.9728	3	3.458	0.4229	0.9999	0.122296	7.25806	-27.3613
Rat#12	Post-day2	Formalin	0	0	0.25	0.25	0.666667	0.888889	1	Latency	0.360382	1.06764	4.15957	4.03857	4.193	2.54357	0.416758	16.9953	41	4.59	1.326	0.9772	0.288889	-0.606323	-40.3359
Rat#13	Post-day2	Saline	0	0	0	0.714286	0.714286	0.714286	0.971429	Latency	0.455588	0.42	1.50536	0.743571	0.744214	0.5535	0.721441	16.318	1	3.758	0.1948	0.9595	0.0518361	-7.68853	-70.5273
Rat#14	Post-day2	Formalin	0	0	0.0769231	0.357143	0.857143	0.928571	1	Latency	0.274559	0.299571	1.17562	1.15371	0.670714	0.423786	0.309618	17.9041	2	4.22	0.6999	0.9978	0.165853	-21.8084	-52.5896
Rat#15	Post-day2	Saline	0.0294118	0.0714286	0.384615	0.785714	0.857143	1	0.942857	Latency	0.561303	0.625143	0.731462	0.466571	0.357286	0.345214	0.11597	17.6494	2	3.343	0.6536	0.9896	0.195513	-13.9068	508.803
Rat#1	Post-day3	Saline	0	0.142857	0.571429	0.714286	0.928571	1	0.914286	Latency	0.782074	1.46393	1.80743	1.00671	2.14764	0.830071	0.410889	17.645	1	3.165	0.7669	0.9695	0.242306	2.59319	105.531
Rat#2	Post-day3	Saline	0	0	0.214286	0.571429	0.857143	0.785714	1	Latency	0.252529	0.3745	0.508571	0.483714	0.352571	0.324714	0.286324	16.453	1	3.729	0.711	0.976	0.190668	-32.5068	-54.5147
Rat#3	Post-day3	Saline	0	0	0.428571	0.625	0.5	0.666667	0.875	Latency	0.492613	3.081	3.10836	2.13177	2.46264	2.19629	0.002	16.9635	39	3.124	0.1249	0.8905	0.0399808	-7.2997	-86.5534
Rat#4	Post-day3	Saline	0	0	0.307692	0.583333	0.769231	0.769231	0.885714	Latency	1.00724	0.543615	1.40721	1.39477	0.864462	0.766538	0.283226	13.2449	8	3.524	0.7359	0.9806	0.208825	16.112	56.1815
Rat#5	Post-day3	Saline	0	0	0.153846	0.571429	0.5	0.785714	0.969697	Latency	0.815912	1.38207	1.24071	0.805786	1.30062	0.808357	0.51175	15.6943	8	4.489	1.627	0.9167	0.362442	11.6667	-15.6332
Rat#6	Post-day3	Saline	0	0	0.538462	0.714286	0.5	0.642857	0.857143	Latency	0.281647	0.665	0.887643	0.516643	0.632357	0.333071	0.1838	16.8866	2	3.029	0.1717	0.9034	0.0566854	-23.9136	-79.2014
Rat#7	Post-day3	Formalin	0	0.0714286	0.0714286	0.230769	0.428571	0.5	0.857143	Latency	0.961879	1.1355	0.884929	1.06069	0.744	0.576786	0.2286	17.8947	3	5.873	2.266	0.9686	0.385833	56.4465	25.9495
Rat#8	Post-day3	Formalin	0.0285714	0.0714286	0.416667	0.5	0.6	0.692308	1	Latency	0.155031	0.619286	2.01607	2.9155	2.64379	0.807357	0.335559	19.33	13	4.41	2.144	0.9066	0.486168	11.0551	44.2879
Rat#9	Post-day3	Formalin	0	0.538462	0.625	0.818182	1	1	1	Latency	0.804912	1.69243	2.81307	2.36286	1.61693	0.2835	0.429706	18.6236	12	2.803	0.8652	0.9145	0.308669	-34.2173	9.42095
Rat#10	Post-day3	Formalin	0	0.0714286	0.818182	0.923077	1	0.928571	0.971429	Latency	0.312706	0.5015	2.14464	1.39557	1.22621	0.428786	0.336294	19.1409	8	2.894	0.2596	0.9965	0.0897028	-10.0684	-52.3893
Rat#11	Post-day3	Formalin	0	0.0769231	0.692308	0.714286	0.615385	0.928571	0.942857	Latency	0.611437	0.743357	1.53336	1.33629	0.922692	0.351571	0.183065	18.2152	4	2.872	0.2701	0.9103	0.094046	-10.9181	-44.1407
Rat#12	Post-day3	Formalin	0	0	0.25	0.5	1	0.923077	0.878788	Latency	0.340059	1.33693	4.24971	3.77629	3.309	1.04257	0.419828	16.5316	36	3.805	0.734	0.9775	0.192904	-17.605	-60.1596
Rat#13	Post-day3	Saline	0	0.0714286	0.166667	0.642857	0.714286	0.928571	1	Latency	0.400879	0.815071	2.70029	1.43471	1.21457	0.8715	0.586382	17.1196	4	3.859	0.9985	0.9653	0.258746	-5.20757	47.1165
Rat#14	Post-day3	Formalin	0.0571429	0	0.285714	0.5	0.857143	1	1	Latency	0.35924	1.08057	1.559	1.25186	0.765429	0.560077	0.314412	17.8966	1	3.946	1.025	0.9894	0.259757	-26.8853	-25.7465
Rat#15	Post-day3	Saline	0	0.0714286	0.571429	0.923077	0.928571	1	1	Latency	0.530529	0.549071	0.5665	0.622692	0.146643	0.0592857	0.158788	18.6004	2	3.083	0.4043	0.9958	0.131139	-20.6026	308.349

## Sheet: 0.6 -2.4s-nociceptive behaviors
Number		Treatment	0-5min	5-10min	10-15min	15-20min	20-25min	25-30min	30-35min	35-40min	40-45min	45-50min	50-55min	55-60min	60-65min	65-70min	Total	Phase1(0-10 min)	Phase2(20-60min)
Rat#1	injection	Formalin	78	4	5	24	43	24	23	39	26	10	0	26	4	1	307	82	191
Rat#2	injection	Saline	26	2	0	0	0	0	0	7	0	3	0	0	0	0	38	28	10
Rat#3	injection	Saline	0	0	0	2	4	2	4	2	3	0	0	0	0	0	17	0	15
Rat#4	injection	Saline	0	0	0	0	0	3	0	0	0	4	0	0	0	2	9	0	7
Rat#5	injection	Formalin	49	0	0	0	10	23	40	8	12	16	0	7	0	3	168	49	116
Rat#6	injection	Formalin	38	0	2	9	12	42	46	22	7	10	6	0	0	0	194	38	145
Rat#7	injection	Formalin	39	8	3	17	4	8	11	12	3	7	10	8	0	10	140	47	63
Rat#8	injection	Saline	2	0	0	0	0	0	2	0	0	2	3	2	6	2	19	2	9
Rat#9	injection	Formalin	29	3	0	16	4	13	0	4	3	2	0	3	0	0	77	32	29
Rat#10	injection	Formalin	70	15	2	8	2	29	10	21	26	13	61	12	32	0	301	85	174
Rat#11	injection	Saline	0	0	0	4	2	4	3	4	1	0	4	0	4	0	26	0	18
Rat#12	injection	Formalin	112	0	4	3	21	61	58	26	12	35	0	0	0	4	336	112	213
Rat#13	injection	Saline	0	0	0	2	0	2	0	0	0	0	0	0	0	0	4	0	2
Rat#14	injection	Saline	2	3	0	0	0	0	2	0	2	0	0	5	7	0	21	5	9
Rat#15	injection	Formalin	59	7	5	5	13	5	4	8	12	3	0	8	5	3	137	66	53
Rat#16	injection	Saline	6	0	15	2	12	2	11	0	4	2	4	4	0	0	62	6	39

## Sheet: 2-8s-nociceptive behaviors
numbered		Treatment	0-5min	5-10min	10-15min	15-20min	20-25min	25-30min	30-35min	35-40min	40-45min	45-50min	50-55min	55-60min	60-65min	65-70min	Total	Phase1(0-10 min)	Phase2(20-60min)	Note
Rat#1	Injection	Saline	14	13	11	0	0	2	2	0	2	0	0	0	5	0	49	27	6
Rat#2	Injection	Saline	5	6	5	4	10	8	6	1	2	6	2	0	0	0	55	11	35
Rat#3	Injection	Saline	2	2	1	3	6	5	4	4	0	3	4	1	0	0	35	4	27
Rat#4	Injection	Saline	7	7	3	5	3	0	0	3	0	0	2	0	0	2	32	14	8
Rat#5	Injection	Saline	6	5	3	0	9	3	2	0	3	0	6	5	0	4	46	11	28
Rat#6	Injection	Saline	8	5	2	0	14	0	6	0	6	4	2	6	0	0	53	13	38
Rat#7	Injection	Formalin	61	17	7	0	3	31	24	15	22	14	8	25	20	38	285	78	142
Rat#8	Injection	Formalin	91	7	3	2	72	61	73	47	20	0	13	31	0	33	453	98	317
Rat#9	Injection	Formalin	119	7	10	8	2	3	5	31	67	58	6	28	0	0	344	126	200
Rat#10	Injection	Formalin	74	2	0	0	0	6	0	5	2	3	2	0	5	0	99	76	18
Rat#11	Injection	Formalin	55	0	6	0	7	2	0	12	21	16	21	8	49	15	212	55	87
Rat#12	Injection	Formalin	54	2	7	13	32	22	7	4	4	7	6	7	0	0	165	56	89
Rat#13	Injection	Saline	7	2	4	0	7	2	9	0	0	0	4	0	2	2	39	9	22
Rat#14	Injection	Formalin	95	4	11	4	12	12	34	20	11	15	9	0	43	0	270	99	113
Rat#15	Injection	Saline	37	0	0	8	6	4	0	0	4	0	7	0	8	5	79	37	21
