# Supplementary material for: Formalin-induced pain prolongs sub- to supra-second time estimation in rats
Source: PeerJ journal article supplement (doi:10.7717/peerj.11002), 2021-03-02

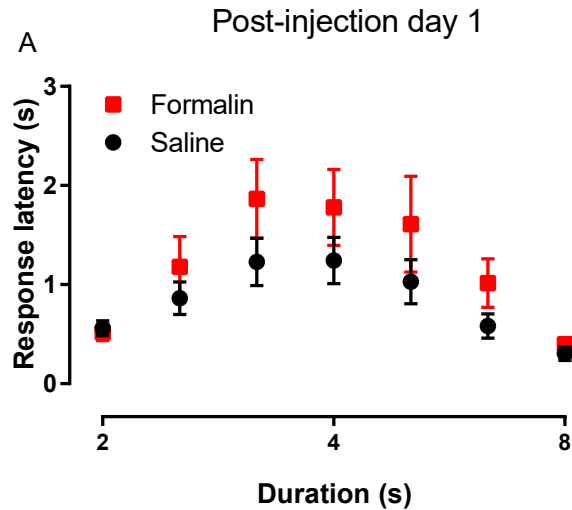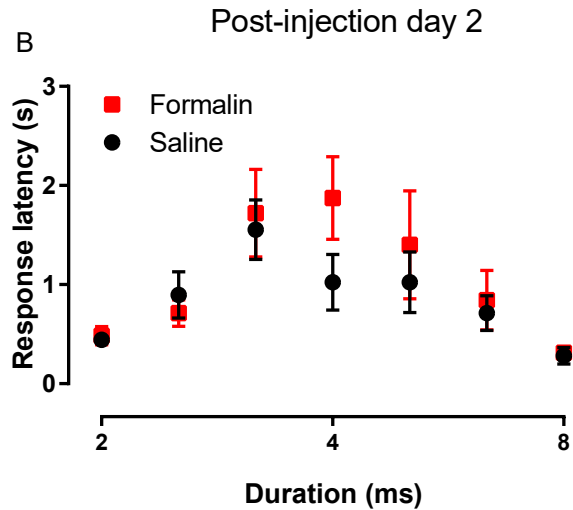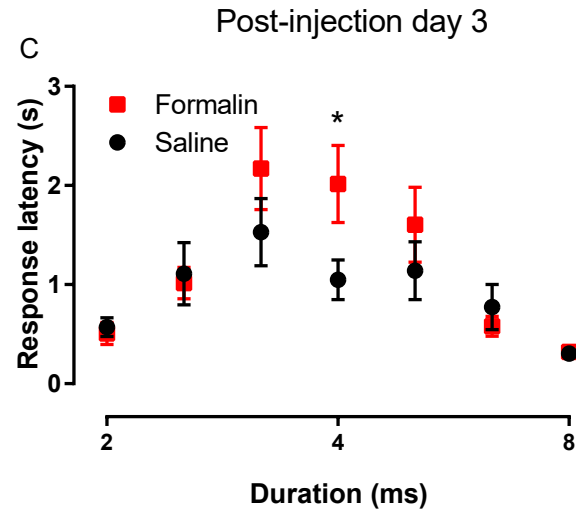

Supplement: Supplemental._Figure_4.pdf [file Supplemental._Figure_4.pdf]
